# Supplementary material for: Maturation of metabolic connectivity of the adolescent rat brain
Source: eLife. 2015 Nov 27;4:e11571. doi: 10.7554/eLife.11571 (PMC4718811; doi:10.7554/eLife.11571)
Supplement: Figure 4—source data 1. — DOI: http://dx.doi.org/10.7554/eLife.11571.014 [file elife-11571-fig4-data1.xlsx]

## Sheet: Sheet1
Energy Efficiency	5 weeks	10 weeks	15 weeks
Hp_L	1.09592	1.76234	1.76696
Hp_R	0.943066	1.72762	0.342931
MedF	0.856391	2.32234	2.87716
Rsp	0.728756	2.43275	3.24101
Mot_L	2.37074	2.71983	3.24419
Mot_R	2.20721	2.36124	2.94964
SS_L	2.50054	1.85471	3.34337
SS_R	1.93173	0.963208	2.32969
